# Supplementary material for: Shifts in the Bacterial Community Related to Quality Properties of Vacuum-Packaged Peeled Potatoes during Storage
Source: MDPI journal article supplement (doi:10.3390/foods11081147), 2022-04-15
Supplement: s1 [file s1]

**Table S1.** Distribution of the identified OTUs of bacterial genus during storage of vacuum-ackaged peeled potato.

| Genus                                                     | OUTs  |       |       |       |
|-----------------------------------------------------------|-------|-------|-------|-------|
|                                                           | 0d    | 4d    | 8d    | 12d   |
| g_unclassified_f_Enterobacteriaceae                       | 1232  | 13681 | 26962 | 22492 |
| g_Serratia                                                | 544   | 19865 | 1847  | 713   |
| g_Pantoea                                                 | 3223  | 4254  | 8555  | 4055  |
| g_Ralstonia                                               | 16373 | 8     | 57    | 1     |
| g_Clostridium                                             | 32    | 0     | 1     | 7463  |
| g_Pseudomonas                                             | 5191  | 1     | 33    | 26    |
| g_unclassified_c_Clostridia                               | 16    | 0     | 0     | 2587  |
| g_Comamonas                                               | 2042  | 0     | 10    | 3     |
| g_Brevundimonas                                           | 1001  | 0     | 5     | 1     |
| g_Lysobacter                                              | 984   | 0     | 4     | 2     |
| g_Delftia                                                 | 877   | 0     | 2     | 0     |
| g_Limnobacter                                             | 799   | 1     | 3     | 1     |
| g_Erwinia                                                 | 0     | 142   | 278   | 229   |
| g_Chryseobacterium                                        | 282   | 0     | 130   | 83    |
| g_Bacillus_f_Bacillaceae                                  | 455   | 0     | 2     | 1     |
| g_Escherichia                                             | 220   | 31    | 74    | 62    |
| g_Corynebacterium                                         | 321   | 0     | 0     | 0     |
| g_Phyllobacterium                                         | 312   | 0     | 0     | 0     |
| g_Luteibacter                                             | 218   | 0     | 0     | 0     |
| g_Rhodococcus_f_Nocardiaceae                              | 187   | 0     | 1     | 0     |
| g_Sphingomonas                                            | 179   | 0     | 0     | 0     |
| g_Leifsonia                                               | 160   | 0     | 0     | 0     |
| g_Flexivirga                                              | 153   | 0     | 0     | 0     |
| g_Tsukamurella                                            | 147   | 0     | 0     | 0     |
| g_Flavobacterium                                          | 74    | 0     | 11    | 61    |
| g_Lacrimispora                                            | 0     | 0     | 1     | 145   |
| g_Neisseria                                               | 134   | 0     | 0     | 0     |
| g_Herbaspirillum                                          | 127   | 0     | 2     | 2     |
| g_Burkholderia                                            | 126   | 0     | 0     | 0     |
| g_Leucobacter                                             | 123   | 0     | 0     | 0     |
| g_Stenotrophomonas                                        | 99    | 0     | 1     | 0     |
| g>Weissella                                               | 95    | 0     | 0     | 0     |
| g_Arthrobacter                                            | 76    | 0     | 0     | 0     |
| g_Nocardioides                                            | 72    | 0     | 1     | 0     |
| g_Prevotella                                              | 65    | 0     | 2     | 0     |
| g_Xenophilus                                              | 66    | 0     | 0     | 0     |
| g_Achromobacter                                           | 62    | 0     | 0     | 0     |
| g_Geobacillus                                             | 62    | 0     | 0     | 0     |
| g_Ensifer                                                 | 58    | 0     | 0     | 0     |
| g_unclassified_c_Deltaproteobacteria                      | 57    | 0     | 0     | 0     |
| g_Curtobacterium                                          | 53    | 0     | 0     | 0     |
| g_unclassified_d_unclassified                             | 53    | 0     | 0     | 0     |
| g_Devosia                                                 | 53    | 0     | 0     | 0     |
| g_unclassified_f_Microbacteriaceae                        | 50    | 0     | 0     | 0     |
| g_Humibacter                                              | 50    | 0     | 0     | 0     |
| g_Blastococcus                                            | 49    | 0     | 0     | 0     |
| g_Pararheinheimera                                        | 47    | 0     | 1     | 0     |
| g_Defluviicoccus                                          | 48    | 0     | 0     | 0     |
| g_Aeromonas                                               | 43    | 0     | 1     | 1     |
| g_Lactococcus                                             | 0     | 0     | 0     | 43    |
| g_unclassified_c_Actinobacteria                           | 41    | 0     | 0     | 0     |
| g_Mycobacterium                                           | 40    | 0     | 0     | 1     |
| g_unclassified_p_Acidobacteria                            | 40    | 0     | 0     | 0     |
| g_Microbacterium                                          | 40    | 0     | 0     | 0     |
| g_Staphylococcus                                          | 36    | 1     | 1     | 1     |
| g_unclassified_f_Clostridiales_Family_XIII_Incertae_Sedis | 37    | 0     | 0     | 0     |
| g_Terrabacter                                             | 34    | 0     | 1     | 0     |
| g_unclassified_f_Sporichthyaceae                          | 33    | 0     | 0     | 0     |
| g_Mesorhizobium                                           | 30    | 0     | 0     | 0     |
| g_Cellvibrio                                              | 28    | 0     | 0     | 0     |
| g_Glutamicibacter                                         | 28    | 0     | 0     | 0     |

|                                                 |    |    |   |    |
|-------------------------------------------------|----|----|---|----|
| g__Acinetobacter                                | 22 | 0  | 3 | 1  |
| g__unclassified_c__Betaproteobacteria           | 27 | 0  | 0 | 0  |
| g__Mediterraneibacter                           | 26 | 0  | 0 | 0  |
| g__Lactobacillus                                | 26 | 0  | 0 | 0  |
| g__Solirubrobacter                              | 25 | 0  | 0 | 0  |
| g__Dietzia                                      | 25 | 0  | 0 | 0  |
| g__Nitrobacter                                  | 25 | 0  | 0 | 0  |
| g__Steroidobacter                               | 24 | 0  | 0 | 0  |
| g__unclassified_o__Bacillales                   | 24 | 0  | 0 | 0  |
| g__Paenibacillus                                | 11 | 0  | 2 | 10 |
| g__Leuconostoc                                  | 0  | 13 | 0 | 9  |
| g__Anaeromyxobacter                             | 22 | 0  | 0 | 0  |
| g__Conexibacter                                 | 19 | 0  | 2 | 0  |
| g__Streptomyces                                 | 21 | 0  | 0 | 0  |
| g__Novosphingobium                              | 20 | 0  | 0 | 0  |
| g__unclassified_c__Alphaproteobacteria          | 20 | 0  | 0 | 0  |
| g__Uliginosibacterium                           | 20 | 0  | 0 | 0  |
| g__Streptococcus                                | 19 | 0  | 0 | 0  |
| g__Bradyrhizobium                               | 18 | 0  | 0 | 0  |
| g__unclassified_p__Candidatus_Saccharibacteria  | 16 | 0  | 1 | 0  |
| g__unclassified_f__Kofleriaceae                 | 17 | 0  | 0 | 0  |
| g__Paracoccus_f__Rhodobacteraceae               | 17 | 0  | 0 | 0  |
| g__Ochrobactrum                                 | 15 | 0  | 0 | 0  |
| g__Methylovorus                                 | 15 | 0  | 0 | 0  |
| g__Dechloromonas                                | 15 | 0  | 0 | 0  |
| g__Cutibacterium                                | 15 | 0  | 0 | 0  |
| g__Methylobacterium                             | 14 | 0  | 0 | 0  |
| g__Pseudochrobactrum                            | 14 | 0  | 0 | 0  |
| g__unclassified_f__Methylocystaceae             | 13 | 0  | 0 | 0  |
| g__unclassified_o__Sphingomonadales             | 13 | 0  | 0 | 0  |
| g__Turicibacter                                 | 13 | 0  | 0 | 0  |
| g__Fictibacillus                                | 12 | 0  | 0 | 0  |
| g__Ectothiorhodospira                           | 13 | 0  | 0 | 0  |
| g__Solibacillus                                 | 12 | 0  | 0 | 0  |
| g__Brachybacterium                              | 12 | 0  | 0 | 0  |
| g__Caulobacter                                  | 11 | 0  | 0 | 0  |
| g__unclassified_f__Thermoactinomyetaceae        | 10 | 0  | 0 | 0  |
| g__unclassified_p__Proteobacteria               | 10 | 0  | 0 | 0  |
| g__Hydrogenophilus                              | 10 | 0  | 0 | 0  |
| g__Georgenia                                    | 10 | 0  | 0 | 0  |
| g__Bosea_f__Bradyrhizobiaceae                   | 9  | 0  | 0 | 0  |
| g__Fusobacterium                                | 8  | 0  | 2 | 0  |
| g__Nitrospira                                   | 9  | 0  | 0 | 0  |
| g__Shimazuella                                  | 9  | 0  | 0 | 0  |
| g__Micromonospora                               | 10 | 0  | 0 | 0  |
| g__Agromyces                                    | 9  | 0  | 0 | 0  |
| g__Bifidobacterium                              | 9  | 0  | 0 | 0  |
| g__Lentzea                                      | 9  | 0  | 0 | 0  |
| g__Acidobacterium                               | 9  | 0  | 0 | 0  |
| g__unclassified_f__Lachnospiraceae              | 8  | 0  | 0 | 0  |
| g__unclassified_o__Myxococcales                 | 9  | 0  | 0 | 0  |
| g__Propioniciclava                              | 8  | 0  | 0 | 0  |
| g__Nonomuraea                                   | 8  | 0  | 0 | 0  |
| g__Isoptericola                                 | 8  | 0  | 0 | 0  |
| g__Shewanella                                   | 8  | 0  | 0 | 0  |
| g__Paraliobacillus                              | 8  | 0  | 0 | 0  |
| g__Pseudarthrobacter                            | 7  | 0  | 0 | 0  |
| g__Azospirillum                                 | 7  | 0  | 0 | 0  |
| g__unclassified_p__Gemmatimonadetes_d__Bacteria | 6  | 0  | 0 | 0  |
| g__Thermoactinomyces                            | 6  | 0  | 0 | 0  |
| g__unclassified_p__Bacteroidetes                | 6  | 0  | 0 | 0  |
| g__Actinotalea                                  | 6  | 0  | 0 | 0  |
| g__Perlucidibaca                                | 5  | 0  | 0 | 0  |
| g__unclassified_f__Acidobacteriaceae            | 5  | 0  | 0 | 0  |
| g__Methyloburum                                 | 6  | 0  | 0 | 0  |
| g__Enterobacter                                 | 0  | 0  | 0 | 5  |
| g__unclassified_o__Sphingobacteriales           | 5  | 0  | 0 | 0  |
| g__Lihuaxuella                                  | 4  | 0  | 0 | 0  |

|                                      |   |   |   |   |
|--------------------------------------|---|---|---|---|
| g_Actinomadura                       | 4 | 0 | 0 | 0 |
| g_unclassified_f_Gemmatimonadaceae   | 3 | 0 | 0 | 0 |
| g_Janthinobacterium                  | 3 | 0 | 0 | 0 |
| g_Pseudonocardia                     | 3 | 0 | 0 | 0 |
| g_Elizabethkingia                    | 3 | 0 | 0 | 0 |
| g_Rubellimicrobium                   | 3 | 0 | 0 | 0 |
| g_unclassified_f_Hyphomicrobiaceae   | 2 | 0 | 1 | 0 |
| g_unclassified_f_Rhodospirillaceae   | 3 | 0 | 0 | 0 |
| g_Actinophytocola                    | 2 | 0 | 0 | 0 |
| g_unclassified_c_Gammaproteobacteria | 2 | 0 | 0 | 0 |
| g_Blautia                            | 2 | 0 | 0 | 0 |
| g_Agrobacterium                      | 2 | 0 | 0 | 0 |
| g_Solanum                            | 2 | 0 | 0 | 0 |
| g_Microbulbifer                      | 2 | 0 | 0 | 0 |
| g_Dongia                             | 2 | 0 | 0 | 0 |
| g_Halomonas                          | 2 | 0 | 0 | 0 |
| g_unclassified_c_Chlamydiia          | 2 | 0 | 0 | 0 |
| g_unclassified_o_Spirochaetales      | 1 | 0 | 0 | 0 |
| g_Nitrosospira                       | 1 | 0 | 0 | 0 |
| g_unclassified_f_Rhodobiaceae        | 1 | 0 | 0 | 0 |
| g_Methylomonas                       | 1 | 0 | 0 | 0 |
| g_unclassified_c_Sphingobacteriia    | 1 | 0 | 0 | 0 |
| g_Simplicispira                      | 0 | 0 | 0 | 1 |
| g_Alkaliflexus                       | 0 | 0 | 0 | 0 |
| g_Peptostreptococcus                 | 0 | 0 | 0 | 0 |
| g_Physalis                           | 0 | 0 | 0 | 0 |
